1 **MGMT genomic rearrangements contribute to chemotherapy resistance in gliomas**

2  
3 Barbara Oldrini<sup>1#</sup>, Nuria Vaquero-Siguero<sup>1#</sup>, Quanhua Mu<sup>2#</sup>, Paula Kroon<sup>1</sup>, Ying Zhang<sup>3</sup>, Marcos  
4 Galán-Ganga<sup>1</sup>, Zhaoshi Bao<sup>2,3</sup>, Zheng Wang<sup>3</sup>, Hanjie Liu<sup>3</sup>, Jason K Sa<sup>4</sup>, Junfei Zhao<sup>5</sup>, Hoon  
5 Kim<sup>6</sup>, Sandra Rodriguez-Perales<sup>7</sup>, Do-Hyun Nam<sup>4</sup>, Roel GW Verhaak<sup>6</sup>, Raul Rabadan<sup>5</sup>, Tao  
6 Jiang<sup>3\*</sup>, Jiguang Wang<sup>2\*</sup> and Massimo Squatrito<sup>1\*</sup>

7  
8 <sup>1</sup>Seve Ballesteros Foundation Brain Tumor Group, Molecular Oncology Programme, Spanish  
9 National Cancer Research Center, CNIO, 28029 Madrid, Spain. <sup>2</sup>Division of Life Science,  
10 Department of Chemical and Biological Engineering, Center of Systems Biology and Human  
11 Health and State Key Laboratory of Molecular Neuroscience, The Hong Kong University of  
12 Science and Technology, Hong Kong, China. <sup>3</sup>Beijing Neurosurgical Institute, Capital Medical  
13 University, 100050 Beijing, China. <sup>4</sup>Institute for Refractory Cancer Research, Samsung Medical  
14 Center, Seoul, Korea. <sup>5</sup>Department of Systems Biology, Columbia University, New York, 10032  
15 NY, USA. <sup>6</sup>The Jackson Laboratory for Genomic Medicine, Farmington, CT 06032, USA.  
16 <sup>7</sup>Molecular Cytogenetics Group, Human Cancer Genetics Program, Spanish National Cancer  
17 Research Center, CNIO, 28029 Madrid, Spain.

18  
19 # Equal contribution

20 \* Correspondence: msquatrito@cniio.es; jgwang@ust.hk; taojiang1964@163.com

21 **Abstract**

22 Temozolomide (TMZ) is an oral alkylating agent used for the treatment of glioblastoma and is  
23 now becoming a chemotherapeutic option in patients diagnosed with high-risk low-grade  
24 gliomas. The O-6-methylguanine-DNA methyltransferase (MGMT) is responsible for the direct  
25 repair of the main TMZ-induced toxic DNA adduct, the O6-Methylguanine lesion. *MGMT*  
26 promoter hypermethylation is currently the only known biomarker for TMZ response in  
27 glioblastoma patients. Here we show that a subset of recurrent gliomas carries *MGMT* genomic  
28 rearrangements that lead to MGMT overexpression, independently from changes in its promoter  
29 methylation. By leveraging the CRISPR/Cas9 technology we generated some of these *MGMT*  
30 rearrangements in glioma cells and demonstrated that the *MGMT* genomic rearrangements  
31 contribute to TMZ resistance both *in vitro* and *in vivo*. Lastly, we showed that such fusions can  
32 be detected in tumor-derived exosomes and could potentially represent an early detection marker  
33 of tumor recurrence in a subset of patients treated with TMZ.

## 34 **Introduction**

35 The therapeutic benefits of TMZ depend on its ability to methylate DNA, which takes place at  
36 the N-7 and O-6 positions of guanine and N-3 position of adenine. Although the minor product  
37 O6-Methylguanine (O6-meG) accounts for less than 10% of total alkylation, it exerts the greatest  
38 potential for apoptosis induction <sup>1</sup>. O6-meG pairs with thymine as opposed to cytosine during  
39 DNA replication. The O6-meG:thymine mismatch can be recognized by the post-replication  
40 Mismatch Repair (MMR) system and, according to the futile repair hypothesis, ultimately  
41 induces DNA double-strand breaks, cell cycle arrest and cell death <sup>2</sup>. The O-6-methylguanine-  
42 DNA methyltransferase (MGMT) is responsible for the direct repair of O6-meG lesion by  
43 transferring the alkyl group from guanine to a cysteine residue. Epigenetic silencing, due to  
44 promoter methylation, of the MGMT gene prevents the synthesis of this enzyme, and as a  
45 consequence increases the tumours sensitivity to the cytotoxic effects induced by TMZ and other  
46 alkylating compounds <sup>3,4</sup>. As today, *MGMT* promoter hypermethylation is the only known  
47 biomarker for TMZ response <sup>4</sup>. However, the discordance between promoter methylation and  
48 protein expression detected in a subset of patients limits the prognostic value of methylation  
49 assessment <sup>5,6</sup>. Moreover, while *MGMT* methylation at diagnosis predicts longer survival, this is  
50 not the case at recurrence <sup>7</sup>. These evidence, would suggest that other mechanisms, in addition to  
51 promoter methylation, could contribute to MGMT upregulation in the recurrent tumors <sup>5,7</sup>.

52  
53 By analyzing a large cohort of IDH wild-type and mutant recurrent gliomas treated with TMZ  
54 we have discovered that a subset of patients carries distinct *MGMT* genomic rearrangements.  
55 These *MGMT* alterations lead to MGMT overexpression, independently from changes in its  
56 promoter methylation, and contribute to TMZ resistance both *in vitro* and *in vivo*.

57

## 58 **Results**

### 59 **Identification of *MGMT* gene fusions in recurrent gliomas**

60 To reveal the landscape of TMZ resistance in glioma patients, we analyzed RNA-sequencing  
61 data of 252 TMZ-treated recurrent gliomas, among which 105 (42%) were newly collected  
62 (Supplementary Data 1). The cohort included 197 (78%) high-grade glioma (HGG) and 55  
63 (22%) low-grade glioma (LGG) patients (Fig. 1a and Supplementary Fig. 1a, b), all of which had

64 been treated with TMZ before recurrence. We then integrated clinical information and performed  
65 bioinformatics analysis to determine the mutational status of several key alterations (Methods).

66  
67 Overall, we found IDH1 mutation in 38.4% (94 out of 245) patients, 1p/19q co-deletion in 9.4%  
68 (23 out of 245) patients, *MGMT* promoter hypomethylation in 38% (52 out of 136) patients, and  
69 hypermutation in 10.7% (27 out of 252) patients (Fig. 1a). By analyzing the RNAseq data of 252  
70 recurrent gliomas, we identified eight different *MGMT* fusions in seven patients (approximately  
71 3% of all patients, 95% CI, 1.1%–5.6%) (Supplementary Data 1). Of note, among the seven  
72 patients who harbor *MGMT* fusions, six are females, which is significantly higher than expected  
73 ( $P=0.015$ , Fisher exact test, Supplementary Fig.1c). Importantly, there was significant mutual-  
74 exclusiveness between *MGMT* hypomethylation, hypermutation and *MGMT* fusion as revealed  
75 by a bootstrapping method ( $P < 10^{-4}$ , see Methods), suggesting these alterations were carrying  
76 out alternative roles during cancer progression.

77  
78 Gliomas with *MGMT* fusions or hypomethylated *MGMT* promoter had significantly higher  
79 *MGMT* expression, while the hypermutated patients showed lowest *MGMT* expression, even  
80 lower than the *MGMT* methylated tumors (Supplementary Fig. 1d, P values calculated by  
81 Wilcoxon rank-sum test). Interestingly, we found that in IDH wildtype glioma patients high  
82 *MGMT* expression indicates worse survival ( $P=0.02$ , log-rank test, Supplementary Fig. 1e),  
83 while it is associated to a trend of better survival in IDH mutant patients ( $P=0.04$ , log-rank test,  
84 Supplementary Fig. 1f). We next performed an in-depth investigation of the eight different  
85 *MGMT* rearrangements: *BTRC-MGMT*, *CAPZB-MGMT*, *GLRX3-MGMT*, *NFYC-MGMT*,  
86 *RPH3A-MGMT* and *SARIA-MGMT* in HGG, and *CTBP2-MGMT* and *FAM175B-MGMT* in LGG  
87 (Fig. 1b). Five of the eight partner genes located on chromosome 10q, mostly close to *MGMT*  
88 (Fig. 1b). Interestingly, although the left partners of the *MGMT* fusions were different, the  
89 transcriptomic breakpoint in *MGMT* invariably located at the boundary of *MGMT* exon 2, which  
90 is 12 bp upstream of the *MGMT* start codon. In three of the rearrangements (*SARIA-MGMT*,  
91 *RPH3A-MGMT* and *CTBP2-MGMT*), *MGMT* coding sequence was fused to the 5'UTR of the  
92 fusion partner. Reconstruction of the chimeric transcripts found all fusions are in-frame, and both  
93 the methyltransferase domain and DNA binding domain of *MGMT* are intact, suggesting the  
94 functions of *MGMT* might be preserved in the fusion proteins (Fig. 1c).

95

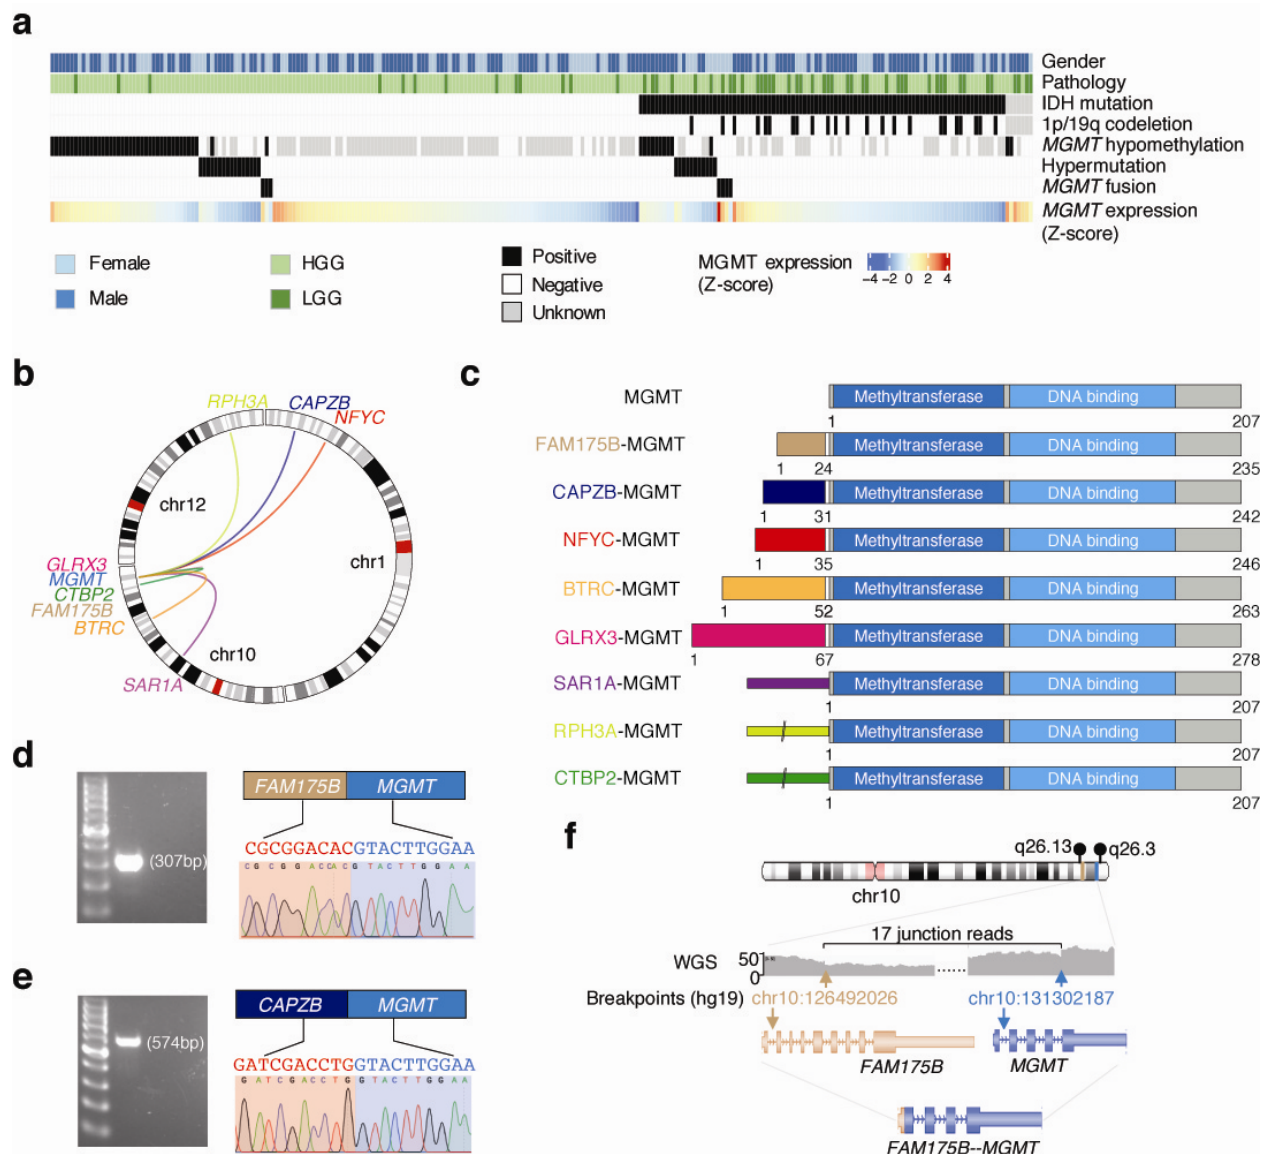

96

97

98 **Fig. 1** Multiple *MGMT* fusions in TMZ-treated recurrent gliomas. **a** Landscape of *MGMT*  
 99 hypomethylation, *MGMT* fusions, hypermutation. **b** Circos plot showing the identified *MGMT*  
 100 fusions. **c** Structure of the *MGMT* fusion proteins. Each partner gene is indicated by color, and  
 101 the narrow bars in *SAR1A-MGMT*, *RPH3A-MGMT* and *CTBP2-MGMT* mean 5'UTR. **d - e**  
 102 Validation of the *MGMT* fusion genes in positive samples by PCR and Sanger sequencing. **f** The  
 103 genomic rearrangement generating *FAM175B-MGMT* fusion. WGS: whole genome sequencing.

104

105 We validated the gene fusions using PCR and Sanger sequencing in samples with enough  
106 specimen available (Fig. 1d, e). For one patient (CGGA\_1729) we performed whole genome  
107 sequencing (WGS), and analysis of structural rearrangements in this sample revealed a deletion  
108 of about 4.8 Mb resulting in the *FAM175B-MGMT* fusion (Fig. 1f).

109

### 110 ***MGMT* genomic rearrangements lead to *MGMT* overexpression independently from** 111 **changes to its promoter methylation status**

112 To characterize the *MGMT* fusions, we sought to generate some of the identified rearrangements  
113 using the CRISPR/Cas9-mediated genome editing. Co-expression of Cas9 with pairs of single-  
114 guide RNAs (sgRNAs) has been used to model a variety of chromosomal rearrangements (such  
115 as translocations, inversions, and deletions) by creating DNA double-strand breaks at the  
116 breakpoints of chromosome rearrangements, which are then joined by non-homologous end  
117 joining<sup>8,9</sup>. We transduced U251 and U87 cells, two *MGMT* methylated GBM cells lines, with  
118 lentiviral vectors expressing different combinations of gRNA pairs directed to 4 different *MGMT*  
119 rearrangements: *BTRC-MGMT*, *NFYC-MGMT*, *SARIA-MGMT* and *CTBP2-MGMT*  
120 (Supplementary Fig. 2a-c). The generation of the expected chromosomal rearrangements was  
121 detected by PCR at the genomic level and confirmed by Sanger sequencing (Supplementary Fig.  
122 3a, b). The mixed cell population carrying the desired genomic rearrangements were then  
123 exposed to TMZ treatment and surviving clones were observed only in the mix cell population of  
124 cells carrying the different fusion events but not in the control cells (sgCtrl, non-targeting  
125 sgRNA) (Fig. 2a). We then isolated some of the TMZ-resistance clones and further confirmed  
126 the presence of the desired fusion events by PCR both at the genomic level (Supplementary Fig.  
127 3c) and at mRNA level by reverse transcription-PCR (RT-PCR) of cDNA fragments overlapping  
128 the fusion exon junctions (Supplementary Fig. 3d-f and Supplementary Fig. 6a). However, we  
129 could not confirm at the genomic level the exact breakpoints in the *CTBP2-MGMT* clones, both  
130 in U251 and U87 cells, possibly to the occurrence of larger deletions that removed the binding  
131 site of the primers used for our initial studies in the mixed population (Supplementary Fig. 3a, b).  
132 Nevertheless, the desired genomic rearrangements were further validated using a break-apart  
133 fluorescence in situ hybridization (FISH) assay (Supplementary Fig. 4).

134

135



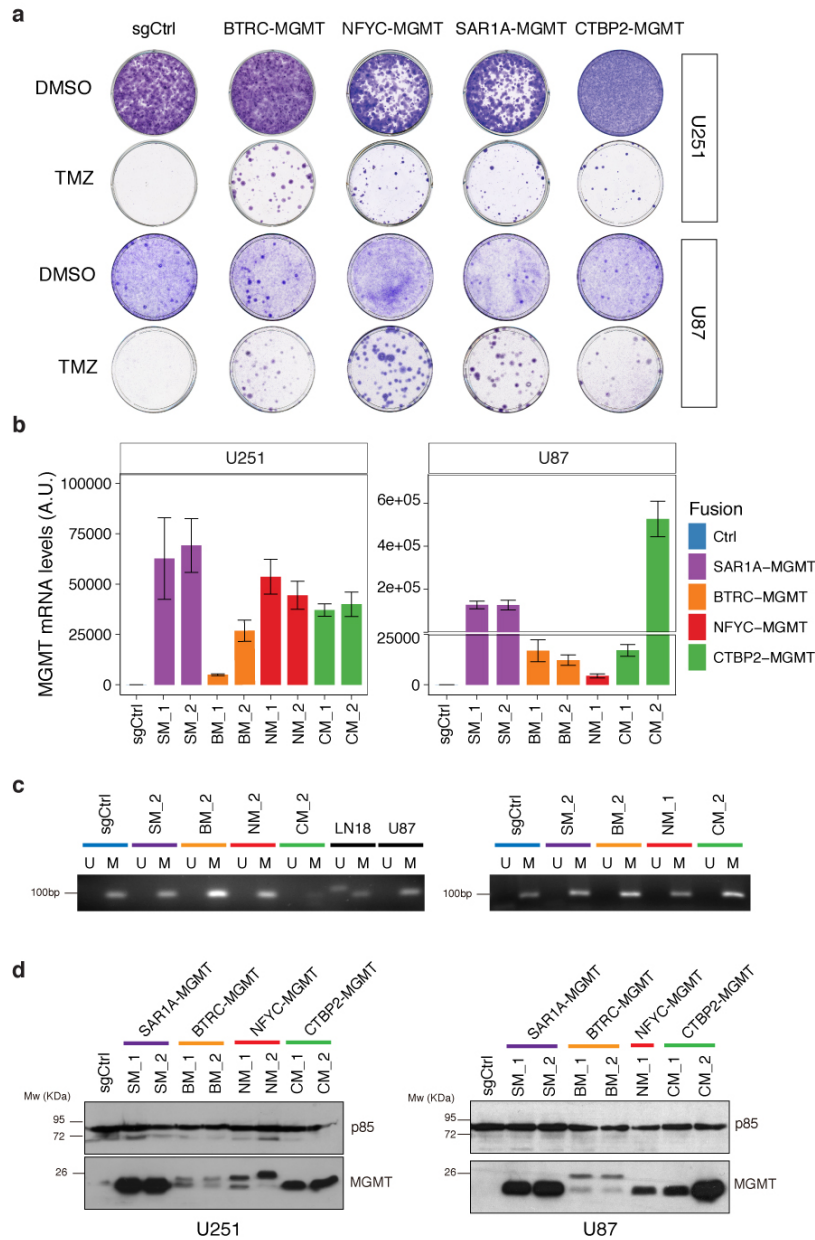

136  
137

138 **Fig. 2** *MGMT* fusion cells show enhanced TMZ resistance via increased *MGMT* overexpression  
 139 **a** Colony forming assay performed on U251 and U87 cells expressing sgCtrl, BTRC-MGMT,  
 140 NFYC-MGMT, SAR1A-MGMT, CTBP2-MGMT exposed for 12 days to TMZ (100  $\mu$ M) or  
 141 DMSO. **b** *MGMT* quantitative-PCRs performed on mRNA from U251 and U87 TMZ resistant  
 142 single cell clones expressing the indicated *MGMT* fusions. Data are from a representative  
 143 experiment repeated in triplicate and presented as mean (technical replicate n=3) and standard  
 144 deviation. **c** Analysis of *MGMT* promoter methylation, by methylation specific PCR (MSP), in  
 145 the TMZ resistant cell clones expressing the indicated *MGMT* fusions from U251 (*left panel*) and  
 146 U87 (*right panel*). M and U lanes indicate methylated and unmethylated status of the promoter,  
 147 respectively. LN18 and U87 cells are shown as control for unmethylated and methylated,  
 148 respectively. **d** Western blot analysis of *MGMT* protein levels in TMZ resistant cell clones from  
 149 U251 and U87 expressing the indicated *MGMT* fusions.

150

151 Promoter exchanges are one class of gene fusions, characterized by the replacement of a gene's  
152 regulatory regions with those of another gene, often resulting in deregulation of transcription of  
153 the genes participating in the fusion event<sup>10-12</sup>. Another class of gene fusions generates chimeric  
154 proteins with biological function different from either of the partner genes from which it  
155 originated<sup>10-12</sup>. Since all the *MGMT* gene fusions identified had similar structures, with the 5'  
156 gene contributing with either small and diverse protein domains or just with the 5'-UTR regions  
157 (Fig. 1c), we hypothesized that the TMZ resistance might be driven by increased *MGMT*  
158 expression due to the rearrangements that bring the *MGMT* gene under the control of a more  
159 active promoter. Real-time quantitative-PCR showed a striking increase of *MGMT* expression in  
160 the clones carrying the different fusions (Fig. 2b), as compared to control cells, without changes  
161 in *MGMT* promoter methylation status, as evidenced by methylation specific PCR (MSP) (Fig.  
162 2c). These results are in line with what observed in the patient cohort: patients carrying *MGMT*  
163 rearrangements showed elevated expression of *MGMT*, concurrently with a methylated *MGMT*  
164 promoter (Fig. 1a and Supplementary Fig. 1d). Western blot analysis, using an anti-*MGMT*  
165 antibody, evidenced a marked overexpression of *MGMT* at the protein level, especially obvious  
166 for the SAR1A-*MGMT* and CTBP2-*MGMT* fusion clones (Fig. 2d). Moreover, we observed  
167 higher molecular weight protein products for BTRC-*MGMT* and NFYC-*MGMT*, consistent with  
168 the expected size of those fusion proteins (Fig. 2b). Of note, the different levels of *MGMT*  
169 expression might be determined by the activity of the specific gene's promoter participating in  
170 the fusion event and/or by the number of copies of the genomic rearrangement in each specific  
171 clone.

172

### 173 ***MGMT* gene fusions contribute to TMZ resistance**

174 To establish whether the TMZ resistance in the clones carrying the fusions was determined by  
175 the over-expression of a fully functional *MGMT* protein, and not caused by other mutations  
176 acquired during TMZ treatment, we analyzed the TMZ sensitivity in presence of O<sub>6</sub>-  
177 benzylguanine (O<sub>6</sub>-BG), a synthetic derivative of guanine that inhibit *MGMT* activity<sup>13</sup>.  
178 Clonogenic assay of two independent U251 clones per fusion showed that the TMZ sensitivity  
179 was re-established by the co-treatment with O<sub>6</sub>-BG (Fig. 3a). By contrast, cells knock-out for the  
180 mismatch repair gene *MSH6*, a proposed TMZ-resistance mechanism independent from *MGMT*

181



182

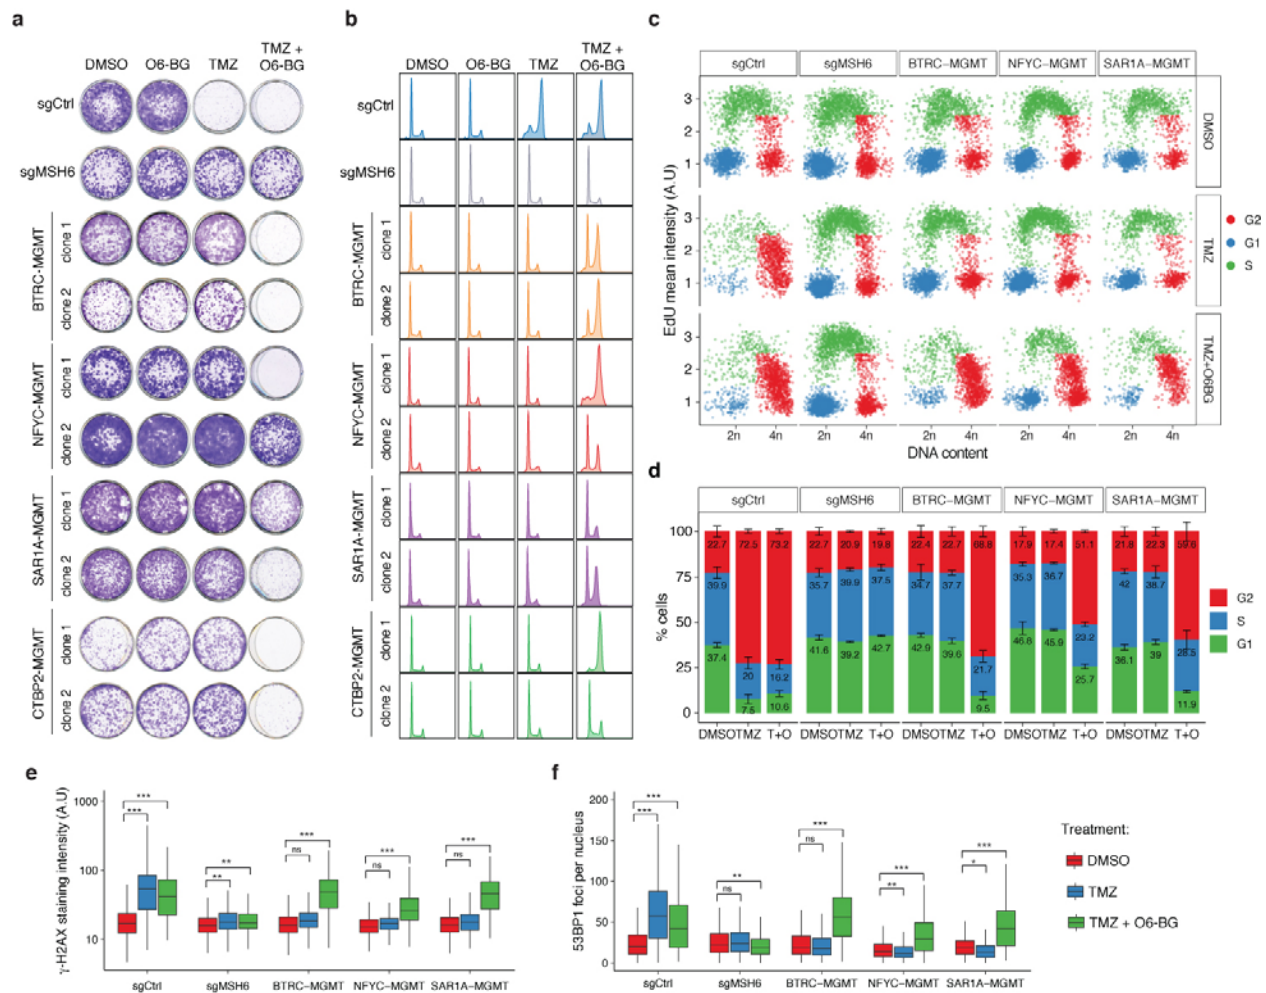

183  
184

185 **Fig. 3** *MGMT* fusions protect from TMZ induced damage. **a** Clonogenic survival assay of U251  
 186 clones expressing *MGMT* fusions exposed to O<sub>6</sub>-BG (100μM) or/and TMZ (100μM) for 12  
 187 days. U251sgMSH6 cells are shown as control for TMZ resistance independently from *MGMT*.  
 188 **b** Cell cycle distribution of U251 *MGMT* fusion expressing cells in presence of O<sub>6</sub>-BG (100μM)  
 189 or/and TMZ (100μM) for 72h, measured by propidium iodide (PI) staining and FACS. U251  
 190 sgCtrl and sgMSH6 are shown as control. **c** High-throughput microscopy mediated quantification  
 191 of cell cycle distribution at 48h after treatment. See methods for details. **d** Quantification of the  
 192 percentage of cells in (c). Data are from a representative experiment repeated in triplicate and  
 193 presented as mean (technical replicate n=3) and standard deviation. **e - f** High-throughput  
 194 microscopy mediated quantification of γH2AX intensity levels and 53BP1 foci in U251 cells  
 195 expressing the *MGMT* fusions after 48h of treatment with 100μM of the indicated drugs.  
 196 U251sgCtrl and sgMSH6 were included as controls. Data are representative of three independent  
 197 experiments. Student's *t* test: \*\*\**P* < 0.001, \*\**P* < 0.01, \**P* < 0.05, ns = not significant; A.U.,  
 198 arbitrary unit.  
 199

200 expression, were fully TMZ-resistant also in the presence of O6-BG. Similarly, cell cycle profile  
201 analysis with propidium iodide staining and EdU incorporation assays showed that the fusion  
202 clones bypassed the TMZ-induced accumulation in G2/M phase and O6-BG co-treatment was  
203 able to re-establish the cell-cycle arrest (Fig. 3b, d). We noticed that individual clones showed  
204 variable TMZ sensitivity when treated concurrently with O6-BG. Clones with higher MGMT  
205 expression (eg. NFYC-MGMT clone 2 and SAR1A-MGMT clones) showed increased resistance  
206 to TMZ, however in these cells increasing doses of O6-BG significantly enhanced TMZ  
207 cytotoxic effect (Supplementary Fig. 5a, b). Same results were obtained in U87 fusion clones  
208 (Supplementary Fig. 6b, c).

209  
210 We then assessed to which extent the TMZ resistance was determined by increased MGMT  
211 activity, and therefore boosted by the DNA repair potential of the fusion clones. Quantitative  
212 high-throughput microscopy analysis revealed that in MGMT fusion expressing cells, similarly  
213 to what observed in sgRNA MSH6 cells, TMZ treatment did not increase levels of  $\gamma$ H2AX and  
214 53BP1 foci, DNA damage markers characteristic of cells bearing DNA double strand breaks  
215 (Fig. 3e, f). However, MGMT inhibition by O6-BG led to the accumulation of  $\gamma$ H2AX and  
216 53BP1 foci upon TMZ treatment in the fusion clones. Taken together these data indicate that  
217 TMZ resistance induced by MGMT genomic rearrangements is mechanistically linked to  
218 MGMT activity.

219  
220 ***MGMT* gene fusions protect from TMZ treatment *in vivo* and are detectable in tumor-**  
221 **derived exosomes**

222 Lastly, we evaluated the TMZ resistance of *MGMT* fusion *in vivo* through establishing *nu/nu*  
223 mice xenograft models with the U251 BTRC-MGMT and control cells, previously transduced  
224 with a luciferase expressing construct. A week after intracranial transplantation, mice were  
225 intraperitoneally treated with TMZ (50mg/Kg) or DMSO (0,3%) for 5 days and tumor growth  
226 was monitored weekly with bioluminescence imaging (BLI) for 4 weeks. Mice with *MGMT*  
227 fusion-bearing tumors exhibited no significant prolonged lifespan between TMZ and DMSO  
228 group and significantly poorer survival compared to control mice when receiving TMZ treatment  
229 (Fig. 4a). BLI analysis confirmed that TMZ antitumor effect was limited to control mice (Fig.

230 4b). Additionally, as shown by immunohistochemistry, the BTRC-MGMT mice had increased  
 231 BrdU  
 232

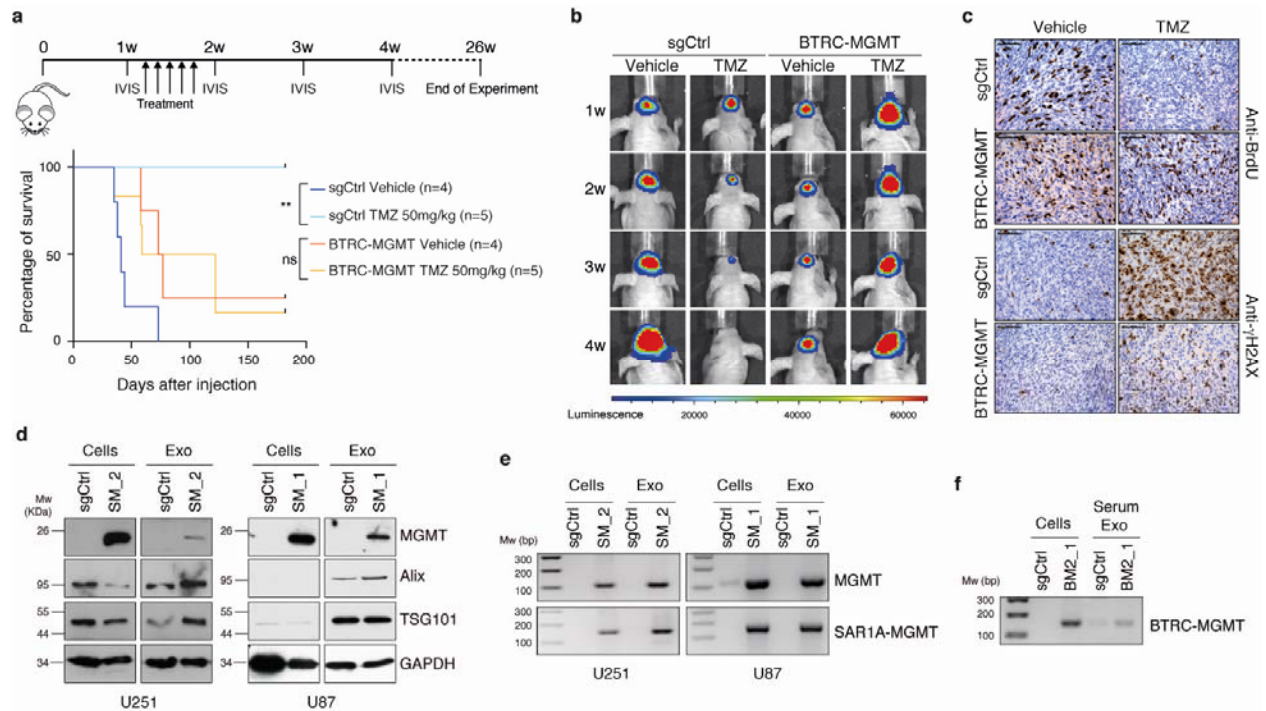

233  
 234 **Fig. 4. MGMT fusions confer TMZ resistance *in vivo* and serve as biomarkers at**  
 235 **recurrence.** **a** Top panel: scheme of the *in vivo* experimental design. Bottom panel: Kaplan-  
 236 Meier survival curve of animals intracranially injected with U251 sgCtrl and U251 BTRC-  
 237 MGMT clone 2 cells transduced with a luciferase construct, treated or not with TMZ (50mg/Kg)  
 238 for 5 days. sgCtrl Log-rank *P* value = 0.0049, BTRC-MGMT Log-rank *P* value = 0.9273. **b**  
 239 Representative bioluminescent images of the tumor bearing at the indicated time points. **c**  
 240 Immunohistochemistry analysis against BrdU and γH2AX of tumors from mice injected with  
 241 U251 sgCtrl and BTRC-MGMT clone 2 cells, treated or not with TMZ (50mg/kg) for 3 days.  
 242 Mice were sacrificed 2h after BrdU injection. Scale bars: 100μm. **d** Western blot analysis of the  
 243 EXO markers Alix and Tgs101 and of MGMT levels in samples pair of cells and cell-derived  
 244 EXOs expressing sgCtrl and SAR1A-MGMT. **e** SAR1A-MGMT and MGMT mRNA expression  
 245 by RT-PCR in RNA pair samples from cells and cell derived EXOs expressing sgCtrl and  
 246 SAR1A-MGMT. **f** Transcript levels of BTRC-MGMT by RT-PCR analysis in EXOs isolated  
 247 from serum of BTRC-MGMT clone 2 tumor bearing mice compared to sgCtrl mice. U251sgCtrl  
 248 and BTRC-MGMT clone 2 cells were included as controls.  
 249

250 incorporation and reduced accumulation of  $\gamma$ H2AX compared to control mice upon TMZ  
251 administration (Fig. 4c), confirming our proliferation and DNA repair *in vitro* results.

252

253 In clinical settings, liquid biopsies can be a powerful non-invasive technique to monitor cancer-  
254 associated genetic alterations by analyzing circulating tumor cells (CTCs), circulating free DNA  
255 (cfDNA) or tumor-derived extracellular vesicle (EV), including exosomes (EXOs). Previous  
256 studies have already showed that: i) glioma derived extracellular vesicle (EV) can cross the  
257 blood brain barrier and be detected in peripheral blood of patients <sup>14</sup>, ii) MGMT mRNA is  
258 enriched in glioma exosomes (EXOs) <sup>15</sup> and iii) other gene fusion were identified in glioma  
259 EXOs <sup>16</sup>. Based on these findings, we assessed whether the *MGMT* fusions could be detected in  
260 EXOs. We purified EXOs from conditioned media of cells harboring SAR1A-MGMT and sgCtrl  
261 by standard ultracentrifugation. NanoSight analysis demonstrated integrity and expected size of  
262 the isolated exosomes (data not shown) and western blot of protein content confirmed  
263 enrichment of the exosome-specific markers Tsg101 and Alix (Fig. 4d). We then analyzed  
264 MGMT levels in protein and mRNA content and observed MGMT upregulation in the exosomes  
265 from the cell lines expressing the fusion event compared to control cells (Fig. 4d, e). Most  
266 importantly, SAR1A-MGMT genomic rearrangement was also detected by RT-PCR in the fusion  
267 exosomes (Fig. 4e). Lastly, to further evaluate a clinical application of our findings, we tested  
268 whether EXOs isolated from blood serum of mice injected orthotopically with the U251 BTRC-  
269 MGMT cells would also exhibit the fusion transcript. Remarkably, RT-PCR analysis confirmed  
270 the presence of the cDNA fusion fragment in the BTRC-MGMT-derived circulating blood EXOs  
271 (Fig. 4f).

272

## 273 **Discussion**

274 Currently, TMZ is the only chemotherapeutic drug that is established to considerably extend the  
275 overall survival of GBM patients and is becoming a therapeutic option also for high-risk low-grade  
276 gliomas <sup>17</sup>. Both intrinsic and acquired resistance might contribute to glioma tumor recurrence  
277 upon TMZ treatment. While *MGMT* promoter hypomethylation is undoubtedly recognized as the  
278 primary mechanism of intrinsic TMZ resistance, the genetic alterations acquired during TMZ  
279 exposure that contribute to tumor relapse still remain to be fully characterized.

280



281 Defects in various components of the MMR machinery possibly represent one of the most well  
282 characterized mechanism of acquired TMZ resistance. Though rarely detected in primary GBMs,  
283 MMR alterations have been previously described in 10-20% of recurrent tumors<sup>7,18-20</sup>. Changes  
284 in *MGMT* promoter methylation status during tumor progression have been observed only in a  
285 small subset of patients<sup>19</sup>. More recently, it has also been suggested that in recurrent GBMs  
286 enhancer hijacking could promote *MGMT* expression, despite promoter methylation, and  
287 therefore TMZ resistance, however the clinical significance of these findings still remain to be  
288 evaluated<sup>5</sup>.

289

290 In this study we demonstrated that *MGMT* fusions represent a previously unidentified genetic  
291 alteration that contribute to *MGMT* overexpression and a novel mechanism of acquired TMZ  
292 resistance that is mutually exclusive from *MGMT* promoter hypomethylation and the  
293 hypermutator phenotype, typically associated with MMR defects. For those patients for which  
294 both primary and recurrent tumor were available (4 out of 7), the *MGMT* rearrangements were  
295 detected only in the tumor relapse. Although we cannot exclude that some of the primary tumors  
296 might express the *MGMT* fusion at subclonal level, and therefore possibly lower than the RNA-  
297 seq detection limits, we speculate that the *MGMT* rearrangements have been acquired during the  
298 course of TMZ treatment and then positively selected due to their ability of driving TMZ  
299 resistance. Very recently, another *MGMT* gene fusion, *ASAP2-MGMT*, with similar features to  
300 the fusions that we have described here in gliomas, has been identified in a medulloblastoma  
301 patient that relapsed after TMZ treatment<sup>21</sup>. These data would suggest that *MGMT* genomic  
302 rearrangements could represent a relevant mechanism of resistance to alkylating agents across a  
303 broader spectrum of tumor types.

304

305 Although the presence of the *MGMT* gene fusions in extracellular vesicles appears to be  
306 promising as a possible liquid biopsy approach for the identification of *MGMT* rearrangements,  
307 its validity still remains to be validated in the clinical settings. Early detection of *MGMT* genetic  
308 rearrangements in patients under treatment would eventually predict early tumor recurrence and  
309 guide therapy decision in a subset of *MGMT* methylated patients. Unlike primary tumors, at the  
310 time of recurrence there is not a standard of care available for gliomas and TMZ rechallenge is  
311 one of the few options in glioblastomas<sup>22</sup>. *MGMT* promoter methylation has been proposed as

312 prognostic marker for benefit from TMZ rechallenge in recurrent glioblastoma<sup>23</sup> and is used as a  
313 stratification factor in trials comprising TMZ treatment<sup>24</sup>. However, our current findings might  
314 limit *MGMT* promoter methylation prognostic value and would predict that a subset of patients  
315 might be assigned to the wrong treatment arm, if based solely on *MGMT* promoter methylation  
316 analysis.

317

318 In summary, here we have presented *MGMT* genomic rearrangements not only as a novel  
319 mechanism of resistance to TMZ in a subset of gliomas, but also, to our knowledge, as a unique  
320 genetic alteration never described before in response to other chemotherapeutic agents.

321

### 322 **Acknowledgements**

323 We would like to acknowledge Claudia Savini, Susana García and Hector Peinado for the help  
324 and discussion on the exosome isolation and analysis. We thank M<sup>a</sup> Carmen Martin Guijarro and  
325 Francisco José Moya for performing the FISH staining. We thank Manuel Perez and Gadea Mata  
326 for their assistance with the high-throughput microscopy analysis. We also thank Alvaro Utero  
327 for the help with the isolation of the blood from the mice. We are very grateful to Anne  
328 Harttrampf and Lilianne Massade for sharing treatment information of the medulloblastoma  
329 patient in which they identified the *ASAP2-MGMT* fusion. This research was supported by funds  
330 from the Seve Ballesteros Foundation and the Asociación Española Contra el Càncer (AECC) to  
331 MS. This work was also supported by Natural Science Foundation of China (NSFC)/Research  
332 Grants Council (RGC) Joint Research Scheme (81761168038 to TJ and N\_HKUST606/17 to  
333 JW), RGC Grants (26102719, No. C6002-17GF, C7065-18GF, R4017-18), ITC grant  
334 (ITCPD/17-9), Beijing Municipal Administration of Hospitals Clinical Medicine Development  
335 of Special Funding Support (ZYLX201708), Beijing Municipal Administration of Hospitals'  
336 Mission Plan (SML20180501), Beijing Nova Program (Z171100001117022) and Beijing Talents  
337 Foundation from Organization department of Municipal committee of the CPC  
338 (2017000021223ZK32).

339

### 340 **Authors' Contributions**

341 MS and JW conceived and supervised the study. TJ provided patient samples. TJ, ZB and ZW  
342 contributed to patient follow-up, tissue collection and sequencing of the CGGA cohort. JS and



343 DN updated clinical data of the SMC cohort. OB, MS, QM and JW wrote the manuscript. OB  
344 designed and performed experiments. N V-Q, PK, YZ, HL and M G-G performed experiments.  
345 QM performed computational analysis. S R-P designed and analyzed the FISH assays. JZ, KH,  
346 RV and RR helped with data analysis.

347

### 348 **Competing Interests**

349 The authors declare no potential conflict of interest.

350

### 351 **Methods**

#### 352 **Patients**

353 The newly sequenced tumors were collected from Beijing Tiantan Hospital as part of the Chinese  
354 Glioma Genome Atlas project (CGGA, <http://cgga.org.cn/>). The study was approved by the  
355 institutional review board in Capital Medical University (IRB ID: KYSB2015-023). Informed  
356 consent was obtained from each patient before surgery. For each specimen, the pathological  
357 diagnosis was reviewed by board-certificated pathologists. The specimen was flash-frozen within  
358 5 mins after being resected for subsequent RNA extraction and sequencing.

359 We also curated RNA-sequencing from four published studies. This include 72 samples from  
360 Wang et al (2016)<sup>7</sup>, 42 samples from Hu et al (2018)<sup>25</sup>, 28 samples from Bao et al (2014)<sup>26</sup> and  
361 5 samples from The Cancer Genome Atlas (2018)<sup>27</sup> (Supplementary Fig.1 and Supplementary  
362 Data 1).

363 The most recent follow-up information of the TCGA patients were retrieved from NCI Genomics  
364 Data Commons (GDC) data portal (<https://portal.gdc.cancer.gov>, accessed on July 18, 2019).  
365 Similarly, we used the most recent follow-up information (last follow-up in December 2018) of  
366 all patients from CGGA. For the 41 patients from Samsung Medical Center (SMC), patient  
367 follow-up continued after the publication of our last study<sup>7</sup>, and the updated data was used in  
368 this study. In total, 12 out of 41 patients changed survival status and/or surviving time. In  
369 addition, the MGMT methylation status of the recurrent gliomas from seven patients were newly  
370 tested and updated in this study.

371

#### 372 **RNA sequencing and gene expression quantification**

373 RNA sequencing assay of the newly collected glioma samples in this study was performed using  
374 the same protocol as our previous research<sup>28</sup>. For each sample, about 80 million reads were  
375 generated.

376 The cleaned RNA sequencing reads were mapped to the reference human genome assembly of  
377 Ensembl GRCh37 annotation version 75 using STAR<sup>29</sup> with default parameters. Reads mapped  
378 to each gene were counted using FeatureCount<sup>30</sup> and transformed to RPKM. Since our cohort  
379 includes samples from multiple cohorts, we used Z-score of MGMT expression in the recurrent  
380 glioma samples within each cohort for normalization to overcome potential batch effects.

381

### 382 **Detection of MGMT fusion from RNA sequencing data**

383 RNA sequencing data from previous publications were downloaded, and the reads were  
384 extracted using samtools<sup>31</sup>. STAR-fusion<sup>32</sup> was utilized to identify and annotate gene fusion  
385 candidates, using the fastq files as input. The fusion candidates were then filtered by removing  
386 fusions that were present in normal tissues, fusions involving mitochondria genes and  
387 uncharacterized genes, and fusions of two paralog genes.

388

### 389 **Whole genome sequencing and analysis**

390 For one MGMT fusion positive case (CGGA\_1729) we had enough sample for whole genome  
391 sequencing. Total DNA was extracted and sequenced using Illumina HiSeq 4000 platform. The  
392 sequencing depth is about 50x. Sequencing reads were then cleaned and mapped to hg19  
393 reference genome using bwa mem<sup>33</sup>. Duplicates were marked using Picard MarkDuplicates tool  
394 (<https://broadinstitute.github.io/picard/>). Structural variants were identified using Manta<sup>34</sup>, and  
395 the variant related to the MGMT fusion was manually picked.

396

### 397 **Determination of IDH, 1p/19q co-deletion and hypermutation**

398 The mutation status of IDH1 Arginine 132 and IDH2 Arginine 172 were determined from RNA-  
399 seq data using samtools mpileup. At least 5 reads were required to cover the hotspot position,  
400 otherwise the result was marked as not available (NA).

401 The 1p/19q codeletion status was predicted using CNAPE  
402 (<https://github.com/WangLabHKUST/CNAPE>). CNAPE is a software to predict large-scale copy  
403 number alteration from gene expression data using multinomial logistic regression models

404 trained on TCGA data and have shown high sensitivity and specificity. The 1p/19q co-deletion  
405 prediction results were further confirmed by the allele frequency of common SNPs.  
406 Hypermethylation was identified using a computational method based on RNA sequencing data <sup>35</sup>.

407

#### 408 **A bootstrapping method to test mutual-exclusiveness**

409 To test whether the three TMZ-resistance-related alterations, namely *MGMT* promoter  
410 hypomethylation, hypermethylation and *MGMT* fusion, are mutually exclusive, we reasoned that if  
411 they are mutual exclusive, then when combined they should cover significantly more patients  
412 than random. Note the contraposition also holds. We therefore randomly assigned the patients  
413 whether they had the alteration and summarized the number patients that had at least one of the  
414 three alterations. This randomized assignment was repeated for 10,000 times. P-value was  
415 calculated by (times for which the number of covered patients is larger than the observed number  
416 of patients carrying at least one such alteration)/10000.

417

#### 418 **PCR validation of MGMT fusion in patient samples**

419 Total RNA was extracted from the positive fusion glioma samples using RNeasy Mini Kit  
420 (Qiagen) according to the manufacturer's instructions, and RNA intensity was examined by  
421 Bioanalyzer 2100 (Agilent Technologies). Then cDNA was synthesized from 1 µg of total RNA  
422 using the RevertAid First Strand cDNA Synthesis kit (Thermo Fisher Scientific, Cat. K1622),  
423 with random hexamer as the primer. The *MGMT* fusion gene fragments were amplified by PCR  
424 using specific primers (Supplementary Table 2). The PCR products were purified using a  
425 QIAquick PCR purification kit (Qiagen, Cat. 28104) and sequenced by an ABI Prism 3730 DNA  
426 sequencer (Applied Biosystems).

427

#### 428 **DNA constructs, Design and Cloning of guide RNAs**

429 The pKLV-U6gRNA-PGKpuro2ABFP (Plasmid #50946) and the lentiCas9-Blast (Plasmid  
430 #52962) were obtained from Addgene. The HSV1-tk/GFP/firefly luciferase (TGL) triple reporter  
431 construct was from J. Gelovani Tjuvajev <sup>36</sup>. The gRNA sequences targeting *MGMT*, *BTRC*,  
432 *NFYC*, *SAR1A* and *CTBP2* were designed using the Genetic Perturbation Platform web portal  
433 (<http://portals.broadinstitute.org/gpp/public/analysis-tools/gRNA-design>) (Supplementary Table  
434 3). The paired sgRNAs were sub-cloned into the pKLV-U6gRNA-PGKpuro2ABFP as

435 previously described<sup>9</sup>. Briefly, the oligonucleotides containing the different gRNA-pairs  
436 (Supplementary Table 4) were amplified with Phusion High-Fidelity polymerase (New England  
437 Biolabs, M0530S) using primer F5 and R1 (Supplementary Table 2). PCR products were gel-  
438 purified and ligated to *Bbs*I-digested pDonor\_mU6 plasmid (kindly provided by A. Ventura) by  
439 using the Gibson Assembly Master Mix (New England Biolabs 174E2611S). The Gibson  
440 reaction was then digested with *Bbs*I at 37 °C for 3 hours. The linearized fragment containing  
441 the pair gRNA, the mU6 promoter and the gRNA scaffold was gel-purified and cloned into the  
442 pKLV-U6gRNA-PGKpuro2ABFP. All the constructs were verified by Sanger-sequencing.

443

#### 444 **Cell Lines, Transfections, Infections and Reagents**

445 The human glioma cell lines U251 was kindly provided by Eric Holland and U87 (HTB-14) was  
446 purchased from ATCC. The Gp2-293 packaging cell line was purchased from Clontech (Cat.  
447 631458). Cells were cultured in DMEM (Sigma-Aldrich, Cat. D5796) + 10% FBS (Sigma-  
448 Aldrich, Cat. F7524). All the cell lines were routinely checked for Mycoplasma contamination  
449 by PCR analysis. DNA fingerprinting has been performed for authentication of the glioma cell  
450 lines (data available upon request).

451 Lentiviruses were generated by co-transfection of lentiviral plasmids (pKLV-U6gRNA-  
452 PGKpuro2ABFP and lentiCas9-Blast) and 2nd generation packaging vectors (pMD2G and  
453 psPAX2) in Gp2-293 cells using calcium-phosphate precipitate. High-titer virus was collected at  
454 36 and 60 hours following transfection and used to infect cells in presence of 7 µg/ml polybrene  
455 (Sigma-Aldrich, Cat. H9268-5G) for 12 hours. Transduced cells were selected with Blasticidin  
456 (3 µg/ml) (Gibco, Cat. A11139-03) and Puromycin (1.5 µg/ml) (Sigma-Aldrich, Cat. P8833-  
457 25MG).

458 Temozolomide was purchased from Selleckchem (Cat. S1237). *O*<sup>6</sup>-Benzylguanine was from  
459 Sigma-Aldrich (Cat. B2292-50MG).

460

#### 461 **Immunoblotting**

462 Cells were lysed with RIPA lysis buffer (20 mM Tris-HCl, 150mM NaCl, 1% NP-40, 1mM  
463 EDTA, 1mM EGTA, 1% sodium deoxycholate, 0,1% SDS) and protein concentrations were  
464 determined by DC protein assay kit (Biorad, Cat. 5000111). Proteins were run on house-made  
465 SDS-PAGE gels and transferred to nitrocellulose membrane (Amersham, Cat. GEHE10600003).

466 Membranes were first incubated in blocking buffer (5% milk 0.1% Tween, 10mM Tris at pH 7.6,  
467 100mM NaCl) and then with primary antibody MGMT (Biosciences, Cat. 557045, 1:2000), Alix  
468 (Cell Signaling, Cat. 2171, 1:1000), TSG101 (BD Transduction Laboratories, Cat. 612696,  
469 1:2000) overnight at 4°C and p85 (Millipore, Cat. 0619, 1:10000) and GAPDH (Santa Cruz, Cat.  
470 Sc-365062, 1:500) 1 hour at room temperature. Anti-mouse or rabbit-HRP conjugated antibodies  
471 (Jackson Immunoresearch) were used to detect desired protein by chemiluminescence with ECL  
472 (Amersham, RPN2106).

473

#### 474 **Immunohistochemistry**

475 Tissue samples were fixed in 10% formalin, paraffin-embedded and cut in 3µm sections, which  
476 were mounted in superfrostplus microscope slides (Thermo Scientific, Cat. 165061) and dried.  
477 The immunohistochemistry was performed using an automated immunostaining platform  
478 (Ventana discovery XT, Bond Max II, Leica). Antigen retrieval was performed with low pH  
479 buffer (CC1m) for p-H2AX and high pH buffer (ER2) for BrdU. Endogenous peroxidase was  
480 blocked (peroxide hydrogen at 3%) and slides were then incubated with anti-BrdU (BU-1; 1:100;  
481 GE Healthcare, RPN202) and phospho-histone H2AX (Ser139) (γH2AX, JBW301; 1:4000;  
482 Millipore, 05-636). After the primary antibody, slides were incubated with the corresponding  
483 secondary antibodies when needed (rabbit anti mouse Abcam) and visualization systems (Omni  
484 Map anti-Rabbit, Ventana, Roche; Bond Polymer Refine Detection, Bond, Leica) conjugated  
485 with horseradish peroxidase. Immunohistochemical reaction was developed using 3,30-  
486 diaminobenzidine tetrahydrochloride (DAB) (ChromoMap DAB, Ventana, Roche; Bond  
487 Polymer Refine Detection, Bond, Leica) and nuclei were counterstained with Carazzi's  
488 hematoxylin. Finally, the slides were dehydrated, cleared and mounted with a permanent  
489 mounting medium for microscopic evaluation.

490

#### 491 **Colony Forming Assay**

492 Cells were seeded in 6-well culture plates (5,000 per well) or in 12-well plates (2,200 per well)  
493 in triplicate. After 4 hours from the seeding, Temozolomide (100 or 200µM) and/or *O*<sup>6</sup>-  
494 Benzylguanine (100µM) were added to the cells and fresh media with drugs was replaced after 6  
495 days. Twelve days after plating, resistant colonies were either stained with 0,5M of crystal violet

496 (Alfa Aesar, Cat. B21932) or isolated using cloning cylinders (Corning, Cat. 31666) and  
497 subsequently amplified.

498

#### 499 **Flow Cytometry**

500 Cells were seeded in 6-well culture plates (100,000 per well) in duplicates and cultured in  
501 presence of Temozolomide (100 $\mu$ M) and/or *O*<sup>6</sup>-Benzylguanine (100 $\mu$ M) for 72 hours. Cells were  
502 then harvested by phosphate-buffered saline (PBS), washed twice in cold PBS, fixed with cold  
503 100% Ethanol on ice for 30 minutes and pelleted by centrifugation at 1200 rpm for 10 minutes.  
504 Pellet was then washed twice with PBS and 1% fetal bovine serum (FBS) and stained with 200 $\mu$ l  
505 of propidium iodide (PI) (50 $\mu$ g/ml) overnight. Samples were acquired on a FACS Canto II  
506 (Beckton Dickinson). All data were analyzed using FlowJo 9.9.4 (Treestar, Oregon).

507

#### 508 **High-Throughput Microscopy**

509 Cells (2,000 per well) were grown on a  $\mu$ CLEAR bottom 96 well plates (Greiner Bio-One, Cat.  
510 736-0230) and treated with Temozolomide (100 $\mu$ M) and/or *O*<sup>6</sup>-Benzylguanine (100 $\mu$ M) in  
511 triplicates for 48 hours. EdU (10 $\mu$ M) (Life Technologies, S.A., Cat. A10044) was added to the  
512 media the last hour of incubation with the drugs. Cells were then fixed in 4% PFA for 20  
513 minutes, permeabilized and incubated for 1 hour in blocking solution (3% BSA in 0.1% Triton-X  
514 PBS). EdU incorporation was detected using the Click-iT™ EdU Alexa Fluor® Imaging kit  
515 (Life Technology, S.A., Cat. C-10425). Phospho-histone H2AX (Ser139) ( $\gamma$ H2AX, Merck, Cat.  
516 05-363, 1:1000) and 53BP1 (Novus Biologicals, Cat. NB100-304, 1:3000) immunofluorescence  
517 was performed using standard procedures. Cells were incubated with primary antibodies  
518 overnight at 4°C and secondary antibodies conjugated with Alexa 488 (rabbit) and Alexa 555  
519 (mouse) (Life Technologies, Cat. A-21206 and A-31570 respectively) at 1:400 dilution were  
520 used. Nuclei were visualized by DAPI staining (Sigma Aldrich, Cat. D8417). Images from each  
521 well were automatically acquired by an Opera High-Content Screening System (Perkin Elmer) at  
522 non-saturating conditions with a 20x ( $\gamma$ H2AX) and 40x (53BP1) magnification lens. Images  
523 were segmented using the DAPI staining to generate masks matching cell nuclei from which the  
524 mean signals were calculated. Cell cycle phases were inferred based on DNA content (DAPI  
525 intensity\*nuclear area) and EdU mean intensity: cells with 2n DNA content and EdU negative



526 were considered as G1 phase; <4n DNA content and EdU positive, as S phase; 4n DNA content  
527 and EdU low or negative, as G2 phase.

528

### 529 **Genomic DNA Isolation, gene fusion Analysis and Methylation-specific PCR**

530 Genomic DNA was isolated as previously described<sup>9</sup>. Briefly, cell pellets were incubated in  
531 lysis buffer (10 mM Tris-HCl pH8, 100 mM NaCl, 0.5 mM EDTA, 10% SDS and proteinase K)  
532 for 4 hours at 55°C and genomic DNA was extracted using phenol:chloroform (1:1) and Phase  
533 Lock heavy 2 ml tubes (5PRIME, Cat. 2302830). 0.1 M sodium acetate and 100% cold ethanol  
534 were then added to the recovered aqueous phase. Samples were centrifuged at 15000 rpm for 25  
535 minutes. After washing in 70% cold ethanol, draining and dissolving in water, genomic DNA  
536 was quantified.

537 For detection of gene fusion events, 100ng of DNA were amplified with specific primers listed in  
538 (Supplementary Table 2). PCR products were cloned into the pGEM-T Easy vector (Promega,  
539 Cat. A1360) and submitted to Sanger sequencing.

540 The MGMT promoter methylation status was determined by methylation specific PCR (MSP).  
541 2µg of DNA were subjected to bisulfite treatment using the EpiTect® Bisulfite kit (Quiagen,  
542 Cat. 59104). DNA was cleaned up following manufacturer's instructions and quantified. 30ng of  
543 DNA per sample were PCR amplified with the Platinum SuperFi DNA polymerase (Invitrogen,  
544 Cat. 12351-010) and specific primers to detect methylated and unmethylated MGMT promoter  
545 (Supplementary Table 2). The PCR amplification protocol was as follows: 94°C for 1 min, then  
546 denature at 94°C for 30 sec, anneal at 60°C for 30 sec, extension at 70°C for 30 sec for 35 cycles,  
547 followed by a 7 min final extension.

548

### 549 **Reverse Transcription quantitative PCR and Analysis of cDNA fragments**

550 RNA from cells was isolated with TRIzol reagent (Invitrogen, Cat. 15596-026) according to the  
551 manufacturer's instructions. For reverse transcription PCR (RT-PCR), 500 ng of total RNA was  
552 reverse transcribed using the High Capacity cDNA Reverse Transcription Kit (Applied  
553 Biosystems, Cat. 4368814). The cDNA was used either for quantitative PCR or Sanger  
554 sequencing. The cDNA was PCR-amplified using primers listed in (Supplementary Table 2), in-  
555 gel purified and ligated into the pGEM-T Easy vector (Promega, Cat. A1360) and submitted to  
556 Sanger sequencing. Quantitative PCR was performed using the SYBR-Select Master Mix

557 (Applied Biosystems, Cat. 4472908) according to the manufacturer's instructions. qPCRs were  
558 run and the melting curves of the amplified products were used to determine the specificity of the  
559 amplification. The threshold cycle number for the genes analyzed was normalized to ACTIN.  
560 Sequences of the primers used are listed in Supplementary Table 2.

561

### 562 **Fluorescence *in situ* Hybridization (FISH)**

563 Two sets of FISH probes were used to study the various MGMT genomic rearrangements.  
564 Bacterial artificial chromosomes (BACs) that map at the 5' and 3' *MGTM* flanking regions  
565 (10q26 cytoband), were purchased from BACPAC Resource CHORI and labelled by Nick  
566 translation assay with Spectrum Green (RP11-165L12 and RP11-343L20) and Spectrum Orange  
567 (RP11-960B17 and RP11-357N5) fluorochromes, respectively, to generate a break-apart locus-  
568 specific FISH probe. FISH analyses were performed according to the manufacturers'  
569 instructions, on Carnoy's fixed cells mounted on positively charged slides (SuperFrost, Thermo  
570 Scientific). Briefly, the slides were first dehydrated followed by a denaturing step in the  
571 presence of the FISH probe at 85°C for 10 minutes and left overnight for hybridization at 45°C  
572 in a DAKO hybridizer machine. Finally, the slides were washed with 20×SSC (saline-sodium  
573 citrate) buffer with detergent Tween-20 at 63°C, and mounted in fluorescence mounting medium  
574 (DAPI). FISH signals were manually enumerated within nuclei. FISH images were also captured  
575 using a CCD camera (Photometrics SenSys camera) connected to a PC running the Zytovision  
576 image analysis system (Applied Imaging Ltd., UK) with focus motor and Z stack software.

577

### 578 **Exosomes isolation**

579 To purify exosomes from cell culture, the conditioned media was collected after 72 hours from  
580 10 x 15cm plates and centrifuged at 500x g for 10 min followed by centrifugation at 12,500x g  
581 for 25 min and 100,000x g for 80 min. The exosome pellet was then washed with cold PBS,  
582 centrifuged at 100,000x g for 80 min and re-suspended in 100µl PBS. Isolation of exosomes  
583 from mice serum was performed following the same protocol after an initial centrifugation at  
584 3,000x g for 20 min and a further one at 12,000 for 20 min. Centrifugations were done at 10°C  
585 using a Beckman Optima X100 ultracentrifuge with a Beckman 50.4Ti or 70.1Ti rotor. Exosome  
586 protein content was determined by DC protein assay kit. Particle content was determined by

587 measuring 1  $\mu$ l of exosome aliquot diluted in 1ml PBS with an NTA (NanoSight; Malvern)  
588 equipped with a blue laser (405 nm).

589

### 590 **Orthotopic GBM model, bioluminescence imaging and *in vivo* treatment**

591 U251 sgCtrl and BTRC-MGMT cells were stably transduced with the HSV1-tk/GFP/firefly  
592 luciferase (TGL) triple reporter construct and GFP positive cells were purified by FACS. 4-5  
593 weeks old immunodeficient *nu/nu* mice were then intracranially injected with the sorted cells (5  
594  $\times 10^5$  cells) using a stereotactic apparatus (Stoelting). After intracranial injection, mice were  
595 imaged every week to follow tumor growth and drug response. Mice were anesthetized with 3%  
596 isoflurane before retro-orbital injection with d-luciferin (150mg/Kg) (Perkin Elmer S.L., Cat.  
597 122796) and imaged with an IVIS Xenogen machine (Caliper Life Sciences). Bioluminescence  
598 analysis was performed using Living Image software, version 3. Beginning the day in which  
599 tumors were clearly visible by IVIS, mice were randomized into two groups and Temozolomide  
600 (50mg/Kg) or vehicle (DMSO) was administrated intra-peritoneally daily for 5 days. For  
601 survival curve, mice were then checked until they developed symptoms of disease (lethargy,  
602 weight loss, macrocephaly). For IHC analysis, BrdU (150 $\mu$ g) (Sigma-Aldrich, Cat. B9285) was  
603 administrated intra-peritoneally to mice and mice were then sacrificed two hours later.

604 Mice were housed in the specific pathogen-free animal house of the Spanish National Cancer  
605 Centre under conditions in accordance with the recommendations of the Federation of European  
606 Laboratory Animal Science Associations (FELASA). All animal experiments were approved by  
607 the Ethical Committee (CEIyBA) and performed in accordance with the guidelines stated in the  
608 International Guiding Principles for Biomedical Research Involving Animals, developed by the  
609 Council for International Organizations of Medical Sciences (CIOMS).

610

### 611 **Statistical analysis**

612 Data in bar graphs are presented as mean and SD, except otherwise indicated. Results were  
613 analyzed by unpaired two-tailed Student's *t*-tests or Wilcoxon rank sum test using the R  
614 programming language. Kaplan–Meier survival curves were produced either with GraphPad  
615 Prism (Fig. 4a) or the R programming language (Supplementary Fig. 1e, f); *P* values were  
616 generated using the Log-Rank statistic. Box-plots were made with the “ggplot2” R package.

617

618 **Data availability**

619 The raw sequencing data of the newly sequenced samples are deposited in the Genome Sequence  
620 Archive in BIG Data Center, Beijing Institute of Genomics (BIG), Chinese Academy of  
621 Sciences, under accession number BioProject ID: PRJCA001580 that are publicly accessible at  
622 <http://bigd.big.ac.cn/gsa>. All the other data supporting the findings of this study are available  
623 within the article and its information files and from the corresponding author upon reasonable  
624 request.

625

626 **References**

- 627 1. Kaina, B., Christmann, M., Naumann, S. & Roos, W. P. MGMT: Key node in the battle  
628 against genotoxicity, carcinogenicity and apoptosis induced by alkylating agents. *DNA*  
629 *Repair (Amst)*. **6**, 1079–1099 (2007).
- 630 2. Zhang, J., Stevens, M. F. G. & Bradshaw, T. D. Temozolomide: mechanisms of action,  
631 repair and resistance. *Curr. Mol. Pharmacol.* **5**, 102–14 (2012).
- 632 3. Esteller, M. *et al.* Inactivation of the DNA-Repair Gene *MGMT* and the Clinical Response  
633 of Gliomas to Alkylating Agents. *N. Engl. J. Med.* **343**, 1350–1354 (2000).
- 634 4. Hegi, M. E. *et al.* MGMT Gene Silencing and Benefit from Temozolomide in  
635 Glioblastoma. *N. Engl. J. Med.* **352**, 997–1003 (2005).
- 636 5. Chen, X. *et al.* A novel enhancer regulates MGMT expression and promotes  
637 temozolomide resistance in glioblastoma. *Nat. Commun.* **9**, 2949 (2018).
- 638 6. Kreth, S. *et al.* O6-Methylguanine-DNA Methyltransferase (MGMT) mRNA Expression  
639 Predicts Outcome in Malignant Glioma Independent of MGMT Promoter Methylation.  
640 *PLoS One* **6**, e17156 (2011).
- 641 7. Wang, J. *et al.* Clonal evolution of glioblastoma under therapy. *Nat. Genet.* **48**, 768–76  
642 (2016).
- 643 8. Maddalo, D. *et al.* In vivo engineering of oncogenic chromosomal rearrangements with  
644 the CRISPR/Cas9 system. *Nature* **516**, 423–427 (2014).
- 645 9. Oldrini, B. *et al.* Somatic genome editing with the RCAS-TVA- CRISPR-Cas9 system for  
646 precision tumor modeling. *Nat. Commun.* (2018). doi:10.1101/162669

- 647 10. McPherson, A. *et al.* deFuse: An Algorithm for Gene Fusion Discovery in Tumor RNA-  
648 Seq Data. *PLoS Comput. Biol.* **7**, e1001138 (2011).
- 649 11. Gao, Q. *et al.* Driver Fusions and Their Implications in the Development and Treatment of  
650 Human Cancers. *Cell Rep.* **23**, 227-238.e3 (2018).
- 651 12. Annala, M. J., Parker, B. C., Zhang, W. & Nykter, M. Fusion genes and their discovery  
652 using high throughput sequencing. *Cancer Lett.* **340**, 192–200 (2013).
- 653 13. Dolan, M. E., Moschel, R. C. & Pegg, A. E. Depletion of mammalian O6-alkylguanine-  
654 DNA alkyltransferase activity by O6-benzylguanine provides a means to evaluate the role  
655 of this protein in protection against carcinogenic and therapeutic alkylating agents. *Proc.*  
656 *Natl. Acad. Sci.* **87**, 5368–5372 (1990).
- 657 14. García-Romero, N. *et al.* DNA sequences within glioma-derived extracellular vesicles can  
658 cross the intact blood-brain barrier and be detected in peripheral blood of patients.  
659 *Oncotarget* **8**, 1416–1428 (2017).
- 660 15. Shao, H. *et al.* Chip-based analysis of exosomal mRNA mediating drug resistance in  
661 glioblastoma. *Nat. Commun.* **6**, 6999 (2015).
- 662 16. Zeng, A.-L. *et al.* Tumour exosomes from cells harbouring PTPRZ1–MET fusion  
663 contribute to a malignant phenotype and temozolomide chemoresistance in glioblastoma.  
664 *Oncogene* **36**, 5369–5381 (2017).
- 665 17. van den Bent, M. J. *et al.* Interim results from the CATNON trial (EORTC study 26053-  
666 22054) of treatment with concurrent and adjuvant temozolomide for 1p/19q non-co-  
667 deleted anaplastic glioma: a phase 3, randomised, open-label intergroup study. *Lancet*  
668 **390**, 1645–1653 (2017).
- 669 18. Wang, Q. *et al.* Tumor Evolution of Glioma-Intrinsic Gene Expression Subtypes  
670 Associates with Immunological Changes in the Microenvironment. *Cancer Cell* **32**,  
671 (2017).
- 672 19. Felsberg, J. *et al.* Promoter methylation and expression of MGMT and the DNA mismatch  
673 repair genes MLH1, MSH2, MSH6 and PMS2 in paired primary and recurrent  
674 glioblastomas. *Int. J. cancer* **129**, 659–70 (2011).
- 675 20. Brennan, C. W. *et al.* The Somatic Genomic Landscape of Glioblastoma. *Cell* **155**, 462–

- 676 477 (2013).
- 677 21. Dupain, C. *et al.* Discovery of New Fusion Transcripts in a Cohort of Pediatric Solid  
678 Cancers at Relapse and Relevance for Personalized Medicine. *Mol. Ther.* **27**, 200–218  
679 (2019).
- 680 22. Weller, M., Cloughesy, T., Perry, J. R. & Wick, W. Standards of care for treatment of  
681 recurrent glioblastoma—are we there yet? *Neuro. Oncol.* **15**, 4–27 (2013).
- 682 23. Weller, M. *et al.* MGMT Promoter Methylation Is a Strong Prognostic Biomarker for  
683 Benefit from Dose-Intensified Temozolomide Rechallenge in Progressive Glioblastoma:  
684 The DIRECTOR Trial. *Clin. Cancer Res.* **21**, 2057–2064 (2015).
- 685 24. Hegi, M. E. *et al.* MGMT Promoter Methylation Cutoff with Safety Margin for Selecting  
686 Glioblastoma Patients into Trials Omitting Temozolomide: A Pooled Analysis of Four  
687 Clinical Trials. *Clin. Cancer Res.* **25**, 1809–1816 (2019).
- 688 25. Hu, H. *et al.* Mutational Landscape of Secondary Glioblastoma Guides MET-Targeted  
689 Trial in Brain Tumor. *Cell* **175**, 1665-1678.e18 (2018).
- 690 26. Bao, Z.-S. *et al.* RNA-seq of 272 gliomas revealed a novel, recurrent PTPRZ1-MET  
691 fusion transcript in secondary glioblastomas. *Genome Res.* **24**, 1765–73 (2014).
- 692 27. Ceccarelli, M. *et al.* Molecular Profiling Reveals Biologically Discrete Subsets and  
693 Pathways of Progression in Diffuse Glioma. *Cell* **164**, 550–63 (2016).
- 694 28. Zhao, Z. *et al.* Comprehensive RNA-seq transcriptomic profiling in the malignant  
695 progression of gliomas. *Sci. Data* **4**, 170024 (2017).
- 696 29. Dobin, A. *et al.* STAR: ultrafast universal RNA-seq aligner. *Bioinformatics* **29**, 15–21  
697 (2013).
- 698 30. Liao, Y., Smyth, G. K. & Shi, W. featureCounts: an efficient general purpose program for  
699 assigning sequence reads to genomic features. *Bioinformatics* **30**, 923–930 (2014).
- 700 31. Li, H. *et al.* The Sequence Alignment/Map format and SAMtools. *Bioinformatics* **25**,  
701 2078–2079 (2009).
- 702 32. Haas, B. J. *et al.* STAR-Fusion: Fast and Accurate Fusion Transcript Detection from  
703 RNA-Seq. *bioRxiv* 120295 (2017). doi:10.1101/120295



- 704 33. Li, H. Aligning sequence reads, clone sequences and assembly contigs with BWA-MEM.  
705 (2013).
- 706 34. Chen, X. *et al.* Manta: rapid detection of structural variants and indels for germline and  
707 cancer sequencing applications. *Bioinformatics* **32**, 1220–1222 (2016).
- 708 35. Jiang, B., Mu, Q. & Wang, J. Detecting somatic hypermutation in human cancer using  
709 multiplatform sequencing. in *The National Conference on Bioinformatics and Systems*  
710 *Biology of China* (2018).
- 711 36. Ponomarev, V. *et al.* A novel triple-modality reporter gene for whole-body fluorescent,  
712 bioluminescent, and nuclear noninvasive imaging. *Eur. J. Nucl. Med. Mol. Imaging* **31**,  
713 740–751 (2004).
- 714
